# Supplementary material for: Single-Cell RNA Sequencing and Microarray Analysis Reveal the Role of Lipid-Metabolism-Related Genes and Cellular Immune Infiltration in Pre-Eclampsia and Identify Novel Biomarkers for Pre-Eclampsia
Source: Biomedicines. 2023 Aug 21;11(8):2328. doi: 10.3390/biomedicines11082328 (PMC10452287; doi:10.3390/biomedicines11082328)
Supplement: Supplementary file 1 [file biomedicines-11-02328-s001.zip › Supplementary Table S1.xlsx]

## Sheet: Table S1  Clinical features of 
patient number	maternal age(years)	gravidity	parity	systolic blood pressure at diagnosis(mmHg)	diastolic blood pressure at diagnosis(mmHg)	week at diagnosis（weeks)	week at partus（weeks)	caesarean section	fetal birth weight(g)		group
1	32	2	1	163	115	30	32	yes	1640		EOPE
2	34	2	1	178	119	30	31	yes	1260		EOPE
3	28	1	1	160	110	31	33	yes	1200		EOPE
4	30	2	1	165	112	32	33	yes	1420		EOPE
5	32	2	2	170	115	29	32	yes	1230		EOPE
6	32	1	1	172	112	30	32	yes	1000		EOPE
7	33	3	2	184	112	32	33	yes	1420		EOPE
8	30	2	1	181	116	31	32	yes	1160		EOPE
average	31.375	1.875	1.25	171.625	113.875	30.625	32.25		1291.25
standard deviation	1.92261	0.64087	0.46291	8.7658	2.90012	1.06066	0.707107		196.355
caesarean section percentage								1
1	26	1	1	110	70		36	no	2800		normal control
2	27	2	1	116	67		37	no	3100		normal control
3	30	1	1	105	76		37	no	3200		normal control
4	32	3	2	112	71		37	no	3460		normal control
5	35	3	1	108	74		38	yes	2850		normal control
6	29	2	1	112	72		39	yes	3000		normal control
7	28	2	1	115	81		37	no	3700		normal control
8	32	1	1	110	69		37	no	3540		normal control
average	29.875	1.875	1.125	111	72.5		37.25		3206.25
standard deviation	2.99702	0.834523	0.353553	3.58569	4.44008		0.886405		330.668
caesarean section percentage								0.25
